# Supplementary material
Source: MDPI journal article supplement (https://www.mdpi.com/1424-2818/13/12/626)
Supplement: s1 [file s1]

**Supplementary S2 Table S8 – Mean ( $\pm$ SD) abundances of taxa (n° ind./10 cm<sup>2</sup>)**

| Station |          | Nematoda | Copepoda | Platyhelminthes | Ostracoda | Halacarida | Oligochaeta | Ciliata | Polychaeta | Bivalvia | Gastrotricha | Sincarida | Nectochaeta | Insecta | Chaetognata | Nemertea |
|---------|----------|----------|----------|-----------------|-----------|------------|-------------|---------|------------|----------|--------------|-----------|-------------|---------|-------------|----------|
| 20      | AI       | 1081.12  | 47.16    | 3.49            | 4.66      | 0.58       | 4.08        | 259.07  | 0.58       | 0.00     | 12.23        | 0.00      | 0.00        | 0.00    | 0.00        | 0.58     |
|         | $\pm$ SD | 872.09   | 42.09    | 3.77            | 4.12      | 0.82       | 4.58        | 145.95  | 0.82       | 0.00     | 12.68        | 0.00      | 0.00        | 0.00    | 0.00        | 0.82     |
|         | AC       | 1377.45  | 985.64   | 10.48           | 9.31      | 0.00       | 3.49        | 251.50  | 0.00       | 0.00     | 568.80       | 0.00      | 0.58        | 0.58    | 0.00        | 1.75     |
|         | $\pm$ SD | 547.96   | 407.01   | 6.22            | 5.01      | 0.00       | 3.77        | 69.22   | 0.00       | 0.00     | 534.81       | 0.00      | 0.82        | 0.82    | 0.00        | 2.47     |
|         | NC       | 294.00   | 82.09    | 2.33            | 11.06     | 3.49       | 0.00        | 1.75    | 0.00       | 0.58     | 5.82         | 0.00      | 0.00        | 0.00    | 0.00        | 0.00     |
|         | $\pm$ SD | 234.05   | 40.61    | 3.29            | 2.18      | 3.77       | 0.00        | 2.47    | 0.00       | 0.82     | 7.03         | 0.00      | 0.00        | 0.00    | 0.00        | 0.00     |
|         | NI       | 314.96   | 113.53   | 5.82            | 4.08      | 0.00       | 0.00        | 1039.20 | 0.00       | 0.00     | 34.93        | 0.00      | 0.00        | 0.00    | 0.00        | 0.00     |
|         | $\pm$ SD | 138.34   | 60.55    | 2.97            | 2.18      | 0.00       | 0.00        | 822.51  | 0.00       | 0.00     | 34.61        | 0.00      | 0.00        | 0.00    | 0.00        | 0.00     |
| 50      | AI       | 72.19    | 1141.08  | 69.28           | 4.08      | 1.16       | 23.29       | 385.99  | 1.16       | 0.00     | 137.98       | 0.58      | 0.00        | 0.00    | 0.00        | 0.58     |
|         | $\pm$ SD | 37.98    | 189.94   | 50.67           | 1.65      | 1.65       | 19.47       | 91.23   | 1.65       | 0.00     | 46.49        | 0.82      | 0.00        | 0.00    | 0.00        | 0.82     |
|         | AC       | 182.81   | 72.19    | 15.14           | 1.75      | 0.58       | 40.75       | 140.89  | 0.00       | 0.00     | 214.24       | 0.00      | 0.00        | 0.00    | 0.00        | 1.16     |
|         | $\pm$ SD | 58.80    | 51.44    | 18.94           | 2.47      | 0.82       | 52.71       | 89.36   | 0.00       | 0.00     | 194.31       | 0.00      | 0.00        | 0.00    | 0.00        | 1.65     |
|         | NC       | 3507.09  | 204.93   | 2.91            | 5.82      | 0.58       | 1.16        | 17.47   | 2.33       | 4.08     | 5.82         | 0.00      | 0.00        | 0.00    | 0.58        | 0.00     |
|         | $\pm$ SD | 754.94   | 72.05    | 4.12            | 2.97      | 0.82       | 1.65        | 11.67   | 2.18       | 1.65     | 8.23         | 0.00      | 0.00        | 0.00    | 0.82        | 0.00     |
|         | NI       | 235.20   | 231.13   | 5.82            | 1.75      | 0.00       | 0.00        | 28.53   | 11.06      | 0.00     | 10.48        | 0.00      | 0.00        | 0.00    | 0.00        | 0.00     |
|         | $\pm$ SD | 61.94    | 93.45    | 5.76            | 1.43      | 0.00       | 0.00        | 10.80   | 7.03       | 0.00     | 8.67         | 0.00      | 0.00        | 0.00    | 0.00        | 0.00     |
