# Supplementary material
Source: MDPI journal article supplement (https://www.mdpi.com/1424-2818/13/12/626)
Supplement: s1 [file s1]

**Supplementary S1 - Results of PERMANOVA and t-statistics analyses****Table S1 - results of PERMANOVA analyses on environmental data**

| Source | df | SS     | MS      | Pseudo-F | <i>p</i> | Unique perms |
|--------|----|--------|---------|----------|----------|--------------|
| Ar     | 3  | 148.76 | 49.587  | 161.73   | 0.0002   | 4983         |
| De     | 1  | 64.975 | 64.975  | 211.92   | 0.0002   | 4968         |
| ArxDe  | 3  | 80.357 | 26.786  | 87.362   | 0.0002   | 4989         |
| Res    | 16 | 4.9057 | 0.30661 |          |          |              |
| Total  | 23 | 299    |         |          |          |              |

  

| <i>Pair-wise Within level '20' of factor 'Depth'</i> |        |         |              |               |
|------------------------------------------------------|--------|---------|--------------|---------------|
| Levels                                               | t      | P(perm) | Unique perms | <i>p</i> (MC) |
| AI, AC                                               | 12.875 | 0.0956  | 10           | 0.0002        |
| AI, NC                                               | 11.589 | 0.103   | 10           | 0.0002        |
| AI, NI                                               | 11.575 | 0.0992  | 10           | 0.0002        |
| AC, NC                                               | 7.3428 | 0.0994  | 10           | 0.0006        |
| AC, NI                                               | 12.486 | 0.096   | 10           | 0.0002        |
| NC, NI                                               | 9.3845 | 0.0996  | 10           | 0.0008        |

  

| <i>Pair-wise Within level '50' of factor 'Depth'</i> |        |         |              |               |
|------------------------------------------------------|--------|---------|--------------|---------------|
| Levels                                               | t      | P(perm) | Unique perms | <i>p</i> (MC) |
| AI, AC                                               | 8.5327 | 0.1024  | 10           | 0.0004        |
| AI, NC                                               | 12.998 | 0.1014  | 10           | 0.0002        |
| AI, NI                                               | 6.7712 | 0.103   | 10           | 0.0006        |
| AC, NC                                               | 19.689 | 0.0952  | 10           | 0.0002        |
| AC, NI                                               | 8.5662 | 0.1064  | 10           | 0.0004        |
| NC, NI                                               | 19.987 | 0.096   | 10           | 0.0002        |

  

| <i>Pair-wise Within level 'AI' of factor 'Area'</i> |        |         |              |               |
|-----------------------------------------------------|--------|---------|--------------|---------------|
| Levels                                              | t      | P(perm) | Unique perms | <i>p</i> (MC) |
| 20, 50                                              | 9.1493 | 0.1016  | 10           | 0.0006        |

  

| <i>Pair-wise Within level 'AC' of factor 'Area'</i> |        |         |              |               |
|-----------------------------------------------------|--------|---------|--------------|---------------|
| Levels                                              | t      | P(perm) | Unique perms | <i>p</i> (MC) |
| 20, 50                                              | 12.181 | 0.104   | 10           | 0.0002        |

  

| <i>Pair-wise Within level 'NC' of factor 'Area'</i> |        |         |              |               |
|-----------------------------------------------------|--------|---------|--------------|---------------|
| Levels                                              | t      | P(perm) | Unique perms | <i>p</i> (MC) |
| 20, 50                                              | 9.8307 | 0.1036  | 10           | 0.0006        |

| Pair-wise <i>Within level 'NI' of factor 'Area'</i> |        |         |              |        |
|-----------------------------------------------------|--------|---------|--------------|--------|
| Levels                                              | t      | P(perm) | Unique perms | p(MC)  |
| 20, 50                                              | 13.595 | 0.1034  | 10           | 0.0002 |

**Table S2 - results of PERMANOVA analyses on Species Richness results**

| Source | df | SS     | MS     | Pseudo-F | p      | Unique perms |
|--------|----|--------|--------|----------|--------|--------------|
| Ar     | 3  | 9.7917 | 3.2639 | 3.7302   | 0.0258 | 4910         |
| De     | 1  | 5.0417 | 5.0417 | 5.7619   | 0.0284 | 4712         |
| ArxDe  | 3  | 5.7917 | 1.9306 | 2.2063   | 0.1124 | 4982         |
| Res    | 16 | 14     | 0.875  |          |        |              |
| Total  | 23 | 34.625 |        |          |        |              |

Pair-wise *Within level '20' of factor 'Depth'*

| Levels | t       | P(perm) | Unique perms | p(MC)  |
|--------|---------|---------|--------------|--------|
| AI, AC | 0.5     | 0.8928  | 4            | 0.644  |
| AI, NC | 2.5     | 0.1936  | 3            | 0.0656 |
| AI, NI | 2       | 0.2996  | 3            | 0.1048 |
| AC, NC | 1.8708  | 0.2034  | 4            | 0.1296 |
| AC, NI | 1.6036  | 0.3008  | 3            | 0.1974 |
| NC, NI | 0.70711 | 1       | 1            | 0.515  |

Pair-wise *Within level '50' of factor 'Depth'*

| Levels | t      | P(perm) | Unique perms | p(MC)  |
|--------|--------|---------|--------------|--------|
| AI, AC | 4      | 0.1014  | 3            | 0.018  |
| AI, NC | 2.1213 | 0.2986  | 2            | 0.0982 |
| AI, NI | 3.5355 | 0.0998  | 3            | 0.02   |
| AC, NC | 1      | 1       | 1            | 0.358  |
| AC, NI | 1      | 1       | 1            | 0.3748 |
| NC, NI | 1.4142 | 0.6     | 2            | 0.2428 |

**Table S3 - results of PERMANOVA analyses on Abundances results**

| Source | df | SS       | MS       | Pseudo-F | p      | Unique perms |
|--------|----|----------|----------|----------|--------|--------------|
| Ar     | 3  | 3.99E+06 | 1.33E+06 | 1.502    | 0.2402 | 4984         |
| De     | 1  | 22850    | 22850    | 2.58E-02 | 0.8716 | 4949         |

|       |    |          |          |        |       |      |
|-------|----|----------|----------|--------|-------|------|
| ArxDe | 3  | 2.82E+07 | 9.41E+06 | 10.632 | 0.004 | 4988 |
| Res   | 16 | 1.42E+07 | 8.85E+05 |        |       |      |
| Total | 23 | 4.64E+07 |          |        |       |      |

---

*Pair-wise Within level '20' of factor 'Depth'*

| Levels | t       | P(perm) | Unique perms | p(MC)  |
|--------|---------|---------|--------------|--------|
| AI, AC | 1.4643  | 0.3064  | 10           | 0.2128 |
| AI, NC | 1.5178  | 0.3016  | 10           | 0.192  |
| AI, NI | 0.10837 | 0.8056  | 10           | 0.9164 |
| AC, NC | 2.6305  | 0.1006  | 10           | 0.0636 |
| AC, NI | 1.3725  | 0.2954  | 10           | 0.2346 |
| NC, NI | 1.622   | 0.2094  | 10           | 0.182  |

---

*Pair-wise Within level '50' of factor 'Depth'*

| Levels | t       | P(perm) | Unique perms | p(MC)  |
|--------|---------|---------|--------------|--------|
| AI, AC | 5.3544  | 0.0926  | 10           | 0.004  |
| AI, NC | 3.1881  | 0.0992  | 9            | 0.0354 |
| AI, NI | 8.2771  | 0.1018  | 10           | 0.0008 |
| AC, NC | 5.1243  | 0.085   | 10           | 0.0054 |
| AC, NI | 0.89824 | 0.503   | 10           | 0.4116 |
| NC, NI | 5.5403  | 0.1038  | 10           | 0.0068 |

---

**Table S4 - results of PERMANOVA analyses on Diversity Species index results**

| Source | df | SS       | MS       | Pseudo-F | p      | Unique perms |
|--------|----|----------|----------|----------|--------|--------------|
| Ar     | 3  | 3.2249   | 1.075    | 12.003   | 0.0008 | 4988         |
| De     | 1  | 1.44E-03 | 1.44E-03 | 1.61E-02 | 0.8994 | 4942         |
| ArxDe  | 3  | 1.5307   | 0.51022  | 5.6973   | 0.0076 | 4988         |
| Res    | 16 | 1.4329   | 8.96E-02 |          |        |              |
| Total  | 23 | 6.1899   |          |          |        |              |

---

*Pair-wise Within level '20' of factor 'Depth'*

| Levels | t       | P(perm) | Unique perms | p(MC)  |
|--------|---------|---------|--------------|--------|
| AI, AC | 2.9018  | 0.0966  | 10           | 0.0452 |
| AI, NC | 0.56418 | 0.5984  | 10           | 0.6008 |
| AI, NI | 0.94464 | 0.4984  | 10           | 0.399  |
| AC, NC | 2.5516  | 0.198   | 10           | 0.0628 |

|        |         |        |    |        |
|--------|---------|--------|----|--------|
| AC, NI | 1.7313  | 0.1046 | 10 | 0.1624 |
| NC, NI | 0.44655 | 1      | 10 | 0.6746 |

---

Pair-wise *Within level '50' of factor 'Depth'*

| Levels | t      | P(perm) | Unique perms | $p$ (MC) |
|--------|--------|---------|--------------|----------|
| AI, AC | 1.103  | 0.4016  | 10           | 0.3312   |
| AI, NC | 15.393 | 0.0982  | 10           | 0.0002   |
| AI, NI | 1.0771 | 0.2954  | 10           | 0.3464   |
| AC, NC | 5.0136 | 0.0964  | 10           | 0.0068   |
| AC, NI | 1.4546 | 0.4022  | 10           | 0.2168   |
| NC, NI | 17.4   | 0.0924  | 10           | 0.0002   |

---

**Table S5 - results of PERMANOVA analyses on Evenness results**

| Source | df | SS       | MS       | Pseudo-F | $p$    | Unique perms |
|--------|----|----------|----------|----------|--------|--------------|
| Ar     | 3  | 0.33881  | 0.11294  | 7.8499   | 0.0032 | 4991         |
| De     | 1  | 1.33E-02 | 1.33E-02 | 0.92478  | 0.3478 | 4958         |
| ArxDe  | 3  | 0.24122  | 8.04E-02 | 5.5888   | 0.007  | 4988         |
| Res    | 16 | 0.23019  | 1.44E-02 |          |        |              |
| Total  | 23 | 0.82352  |          |          |        |              |

---

Pair-wise *Within level '20' of factor 'Depth'*

| Levels | t       | P(perm) | Unique perms | $p$ (MC) |
|--------|---------|---------|--------------|----------|
| AI, AC | 2.0161  | 0.1992  | 10           | 0.1188   |
| AI, NC | 1.0439  | 0.4978  | 10           | 0.3522   |
| AI, NI | 1.3941  | 0.3022  | 10           | 0.2418   |
| AC, NC | 0.82729 | 0.4016  | 10           | 0.454    |
| AC, NI | 0.73957 | 0.5016  | 10           | 0.5036   |
| NC, NI | 0.19879 | 0.8986  | 10           | 0.8496   |

---

Pair-wise *Within level '50' of factor 'Depth'*

| Levels | t       | P(perm) | Unique perms | $p$ (MC) |
|--------|---------|---------|--------------|----------|
| AI, AC | 1.5291  | 0.4102  | 10           | 0.2148   |
| AI, NC | 16.598  | 0.0986  | 10           | 0.0002   |
| AI, NI | 0.70713 | 0.4958  | 10           | 0.5306   |
| AC, NC | 5.0442  | 0.0996  | 10           | 0.005    |
| AC, NI | 1.3148  | 0.3952  | 10           | 0.2714   |



| Levels | t     | P(perm) | Unique perms | $p(\text{MC})$ |
|--------|-------|---------|--------------|----------------|
| 20, 50 | 1.404 | 0.1988  | 10           | 0.1928         |

---

Pair-wise *Within level 'NC' of factor 'Area'*

| Levels | t      | P(perm) | Unique perms | $p(\text{MC})$ |
|--------|--------|---------|--------------|----------------|
| 20, 50 | 1.6996 | 0.1976  | 10           | 0.109          |

---

Pair-wise *Within level 'NI' of factor 'Area'*

| Levels | t      | P(perm) | Unique perms | $p(\text{MC})$ |
|--------|--------|---------|--------------|----------------|
| 20, 50 | 5.1197 | 0.0916  | 10           | 0.0186         |

---
