# Supplementary material
Source: MDPI journal article supplement (https://www.mdpi.com/1424-2818/13/12/626)
Supplement: s1 [file s1]

# Supplementary S3 –SIMPER analyses results

**Supplementary Table S9 - Taxa affecting for more than 70% dissimilarities for each pair AreaXDepth interaction detected by SIMPER analysis. Contrib% = percentage contribution of each Taxa to dissimilarities; Cum.% = percentage cumulative contribution of each Taxa to dissimilarities.**

|                    |          |       |                    |          |       |                    |          |       |
|--------------------|----------|-------|--------------------|----------|-------|--------------------|----------|-------|
| Groups AI20 & AC20 |          |       | Groups AI20 & NC20 |          |       | Groups AC20 & NC20 |          |       |
| Taxa               | Contrib% | Cum.% | Taxa               | Contrib% | Cum.% | Taxa               | Contrib% | Cum.% |
| COPEPODA           | 24.93    | 24.93 | CILIATA            | 29.62    | 29.62 | CILIATA            | 20.87    | 20.87 |
| GASTROTRICHA       | 24.7     | 49.63 | NEMATODA           | 18.15    | 47.78 | GASTROTRICHA       | 20.18    | 41.05 |
| NEMATODA           | 12.05    | 61.69 | GASTROTRICHA       | 8.93     | 56.71 | COPEPODA           | 15.2     | 56.25 |
| PLATYHELMINTHES    | 7.2      | 68.88 | OLIGOCHAETA        | 8.18     | 64.89 | NEMATODA           | 14.35    | 70.6  |
| OLIGOCHAETA        | 6.44     | 75.32 | PLATYHELMINTHES    | 7.31     | 72.19 |                    |          |       |
| Groups AI20 & NI20 |          |       | Groups AC20 & NI20 |          |       | Groups NC20 & NI20 |          |       |
| Taxa               | Contrib% | Cum.% | Taxa               | Contrib% | Cum.% | Taxa               | Contrib% | Cum.% |
| NEMATODA           | 19.78    | 19.78 | GASTROTRICHA       | 24.27    | 24.27 | CILIATA            | 44.96    | 44.96 |
| CILIATA            | 17.77    | 37.54 | COPEPODA           | 20.73    | 45.01 | GASTROTRICHA       | 12.8     | 57.76 |
| GASTROTRICHA       | 15.23    | 52.77 | NEMATODA           | 17.03    | 62.04 | NEMATODA           | 11.32    | 69.08 |
| OLIGOCHAETA        | 11.33    | 64.1  | CILIATA            | 12.28    | 74.31 | PLATYHELMINTHES    | 9.87     | 78.95 |
| COPEPODA           | 10.87    | 74.97 |                    |          |       |                    |          |       |
| Groups AI20 & AI50 |          |       | Groups AC20 & AI50 |          |       | Groups NC20 & AI50 |          |       |
| Taxa               | Contrib% | Cum.% | Taxa               | Contrib% | Cum.% | Taxa               | Contrib% | Cum.% |
| COPEPODA           | 25.14    | 25.14 | NEMATODA           | 29.68    | 29.68 | CILIATA            | 22.49    | 22.49 |
| NEMATODA           | 16.81    | 41.95 | GASTROTRICHA       | 11.29    | 40.97 | COPEPODA           | 16.36    | 38.85 |
| GASTROTRICHA       | 14.85    | 56.79 | OLIGOCHAETA        | 10.88    | 51.84 | GASTROTRICHA       | 13.35    | 52.19 |
| PLATYHELMINTHES    | 12.75    | 69.54 | PLATYHELMINTHES    | 9.3      | 61.15 | PLATYHELMINTHES    | 11.88    | 64.07 |
| OLIGOCHAETA        | 8.25     | 77.79 | NEMERTEA           | 5.96     | 67.11 | OLIGOCHAETA        | 11.61    | 75.68 |
|                    |          |       | COPEPODA           | 5.63     | 72.74 |                    |          |       |
| Groups NI20 & AI50 |          |       | Groups AI20 & AC50 |          |       | Groups AC20 & AC50 |          |       |
| Taxa               | Contrib% | Cum.% | Taxa               | Contrib% | Cum.% | Taxa               | Contrib% | Cum.% |
| COPEPODA           | 22.35    | 22.35 | GASTROTRICHA       | 21.64    | 21.64 | COPEPODA           | 23.49    | 23.49 |
| OLIGOCHAETA        | 17.5     | 39.85 | NEMATODA           | 17.78    | 39.42 | NEMATODA           | 19.43    | 42.92 |
| GASTROTRICHA       | 14.09    | 53.94 | OLIGOCHAETA        | 11.42    | 50.84 | GASTROTRICHA       | 11.08    | 54    |

|                    |          |       |                    |          |       |                    |          |       |
|--------------------|----------|-------|--------------------|----------|-------|--------------------|----------|-------|
| NEMATODA           | 10.76    | 64.7  | OSTRACODA          | 9.83     | 60.67 | OLIGOCHAETA        | 9.91     | 63.91 |
| PLATYHELMINTHES    | 9.77     | 74.47 | PLATYHELMINTHES    | 9.01     | 69.68 | OSTRACODA          | 9.86     | 73.77 |
|                    |          |       | COPEPODA           | 8.13     | 77.81 |                    |          |       |
| Groups NC20 & AC50 |          |       | Groups NI20 & AC50 |          |       | Groups AI50 & AC50 |          |       |
| Taxa               | Contrib% | Cum.% | Taxa               | Contrib% | Cum.% | Taxa               | Contrib% | Cum.% |
| CILIATA            | 21.11    | 21.11 | CILIATA            | 21       | 21    | COPEPODA           | 29.14    | 29.14 |
| GASTROTRICHA       | 18.96    | 40.06 | OLIGOCHAETA        | 20.12    | 41.12 | PLATYHELMINTHES    | 11.33    | 40.47 |
| OLIGOCHAETA        | 14.23    | 54.29 | GASTROTRICHA       | 19.33    | 60.45 | CILIATA            | 10.31    | 50.78 |
| OSTRACODA          | 9.54     | 63.83 | OSTRACODA          | 10.14    | 70.59 | OSTRACODA          | 8.79     | 59.57 |
| PLATYHELMINTHES    | 9.31     | 73.14 |                    |          |       | OLIGOCHAETA        | 8.05     | 67.63 |
|                    |          |       |                    |          |       | NEMATODA           | 7.31     | 74.93 |
| Groups AI20 & NC50 |          |       | Groups AC20 & NC50 |          |       | Groups NC20 & NC50 |          |       |
| Taxa               | Contrib% | Cum.% | Taxa               | Contrib% | Cum.% | Taxa               | Contrib% | Cum.% |
| NEMATODA           | 20.62    | 20.62 | GASTROTRICHA       | 23.45    | 23.45 | NEMATODA           | 34.15    | 34.15 |
| CILIATA            | 15.53    | 36.15 | CILIATA            | 12.72    | 36.17 | CILIATA            | 12.36    | 46.51 |
| BIVALVIA           | 11.03    | 47.18 | COPEPODA           | 10.97    | 47.15 | GASTROTRICHA       | 8.52     | 55.03 |
| COPEPODA           | 10.6     | 57.78 | NEMATODA           | 10.6     | 57.74 | BIVALVIA           | 8.09     | 63.13 |
| GASTROTRICHA       | 9.44     | 67.22 | BIVALVIA           | 8.82     | 66.56 | POLYCHAETA         | 7.23     | 70.36 |
| PLATYHELMINTHES    | 6.89     | 74.1  | PLATYHELMINTHES    | 7.87     | 74.43 |                    |          |       |
| Groups NI20 & NC50 |          |       | Groups AI50 & NC50 |          |       | Groups AC50 & NC50 |          |       |
| Taxa               | Contrib% | Cum.% | Taxa               | Contrib% | Cum.% | Taxa               | Contrib% | Cum.% |
| NEMATODA           | 25.57    | 25.57 | NEMATODA           | 24.17    | 24.17 | NEMATODA           | 23.84    | 23.84 |
| CILIATA            | 24.16    | 49.73 | GASTROTRICHA       | 13.43    | 37.6  | GASTROTRICHA       | 16.94    | 40.78 |
| GASTROTRICHA       | 10.71    | 60.44 | CILIATA            | 12.42    | 50.02 | OLIGOCHAETA        | 9.11     | 49.89 |
| BIVALVIA           | 10.04    | 70.48 | PLATYHELMINTHES    | 10.44    | 60.46 | BIVALVIA           | 8.28     | 58.17 |
|                    |          |       | COPEPODA           | 10.35    | 70.82 | CILIATA            | 8.03     | 66.2  |
|                    |          |       |                    |          |       | PLATYHELMINTHES    | 7.58     | 73.78 |
| Groups AI20 & NI50 |          |       | Groups AC20 & NI50 |          |       | Groups NC20 & NI50 |          |       |
| Taxa               | Contrib% | Cum.% | Taxa               | Contrib% | Cum.% | Taxa               | Contrib% | Cum.% |
| NEMATODA           | 17.03    | 17.03 | GASTROTRICHA       | 20.42    | 20.42 | CILIATA            | 18.41    | 18.41 |
| CILIATA            | 16.15    | 33.17 | NEMATODA           | 15.57    | 35.99 | POLYCHAETA         | 17.63    | 36.04 |

|                    |          |       |                    |          |       |                    |          |       |
|--------------------|----------|-------|--------------------|----------|-------|--------------------|----------|-------|
| COPEPODA           | 14.33    | 47.51 | POLYCHAETA         | 13.15    | 49.14 | NEMATODA           | 11.32    | 47.36 |
| POLYCHAETA         | 13.92    | 61.43 | CILIATA            | 12.62    | 61.76 | PLATYHELMINTHES    | 10.86    | 58.22 |
| OLIGOCHAETA        | 9.46     | 70.89 | COPEPODA           | 12.22    | 73.98 | OSTRACODA          | 10       | 68.22 |
| Groups NI20 & NI50 |          |       | Groups AI50 & NI50 |          |       | Groups AC50 & NI50 |          |       |
| Taxa               | Contrib% | Cum.% | Taxa               | Contrib% | Cum.% | Taxa               | Contrib% | Cum.% |
| CILIATA            | 36.96    | 36.96 | CILIATA            | 16.07    | 16.07 | OLIGOCHAETA        | 18.68    | 18.68 |
| POLYCHAETA         | 21.39    | 58.35 | OLIGOCHAETA        | 15.34    | 31.41 | GASTROTRICHA       | 18.24    | 36.92 |
| GASTROTRICHA       | 13.97    | 72.32 | COPEPODA           | 14.68    | 46.09 | POLYCHAETA         | 17.03    | 53.94 |
|                    |          |       | GASTROTRICHA       | 12.65    | 58.74 | COPEPODA           | 11.73    | 65.67 |
|                    |          |       | POLYCHAETA         | 9.87     | 68.61 | CILIATA            | 9.91     | 75.58 |
|                    |          |       | PLATYHELMINTHES    | 9.58     | 78.19 |                    |          |       |
| Groups NC50 & NI50 |          |       |                    |          |       |                    |          |       |
| Taxa               | Contrib% | Cum.% |                    |          |       |                    |          |       |
| NEMATODA           | 33.46    | 33.46 |                    |          |       |                    |          |       |
| BIVALVIA           | 12.46    | 45.92 |                    |          |       |                    |          |       |
| GASTROTRICHA       | 11.23    | 57.16 |                    |          |       |                    |          |       |
| PLATYHELMINTHES    | 9.8      | 66.95 |                    |          |       |                    |          |       |
| POLYCHAETA         | 7.84     | 74.79 |                    |          |       |                    |          |       |

**Supplementary Table S10- results of SIMPER analysis showing main TAXA affecting dissimilarities of area pairs meio-benthic communities compose by rare TAXA. Contrib% = percentage contribution of each TAXA to dissimilarities; Cum.% = percentage comulative contribution of each TAXA to dissimilarities.**

|             |          |       |             |          |       |
|-------------|----------|-------|-------------|----------|-------|
| Pair AI-AC  |          |       | Pair AI-NC  |          |       |
| TAXA        | Contrib% | Cum.% | TAXA        | Contrib% | Cum.% |
| OLIGOCHAETA | 30.06    | 30.06 | OLIGOCHAETA | 27.9     | 27.9  |
| OSTRACODA   | 20.06    | 50.12 | BIVALVIA    | 18.95    | 46.85 |
| NEMERTEA    | 16.7     | 66.82 | HALACARIDA  | 15.74    | 62.59 |
| HALACARIDA  | 11.9     | 78.73 | POLYCHAETA  | 11.65    | 74.24 |
| Pair AC-NC  |          |       | Pair AI-NI  |          |       |

| TAXA        | Contrib% | Cum.% | TAXA        | Contrib% | Cum.% |
|-------------|----------|-------|-------------|----------|-------|
| OLIGOCHAETA | 26.14    | 26.14 | OLIGOCHAETA | 37.45    | 37.45 |
| BIVALVIA    | 17.77    | 43.91 | POLYCHAETA  | 24.24    | 61.68 |
| OSTRACODA   | 15.98    | 59.89 | OSTRACODA   | 13.04    | 74.72 |
| HALACARIDA  | 14.41    | 74.3  |             |          |       |
| Pair AC-NI  |          |       | Pair NC-NI  |          |       |
| TAXA        | Contrib% | Cum.% | TAXA        | Contrib% | Cum.% |
| OLIGOCHAETA | 35.72    | 35.72 | BIVALVIA    | 24.96    | 24.96 |
| POLYCHAETA  | 21.86    | 57.58 | POLYCHAETA  | 24.35    | 49.31 |
| OSTRACODA   | 20.86    | 78.43 | HALACARIDA  | 21.49    | 70.8  |

**Supplementary Table S11- results of SIMPER analysis showing main TAXA affecting dissimilarities between 20 and 50 meters meio-benthic communities compose by rare TAXA. Contrib% = percentage contribution of each TAXA to dissimilarities; Cum.% = percentage comulative contribution of each TAXA to dissimilarities**

| Species     | Contrib% | Cum.% |
|-------------|----------|-------|
| OLIGOCHAETA | 25.8     | 25.8  |
| POLYCHAETA  | 20.81    | 46.61 |
| OSTRACODA   | 17.8     | 64.41 |
| HALACARIDA  | 10.89    | 75.3  |
