# Supplementary material
Source: MDPI journal article supplement (https://www.mdpi.com/1424-2818/13/12/626)

Supplementary S4

Figure S1 – Canonical Analysis of Principal coordinates (CAP) of the factor a) Area and b) Depth on dataset of total taxa.

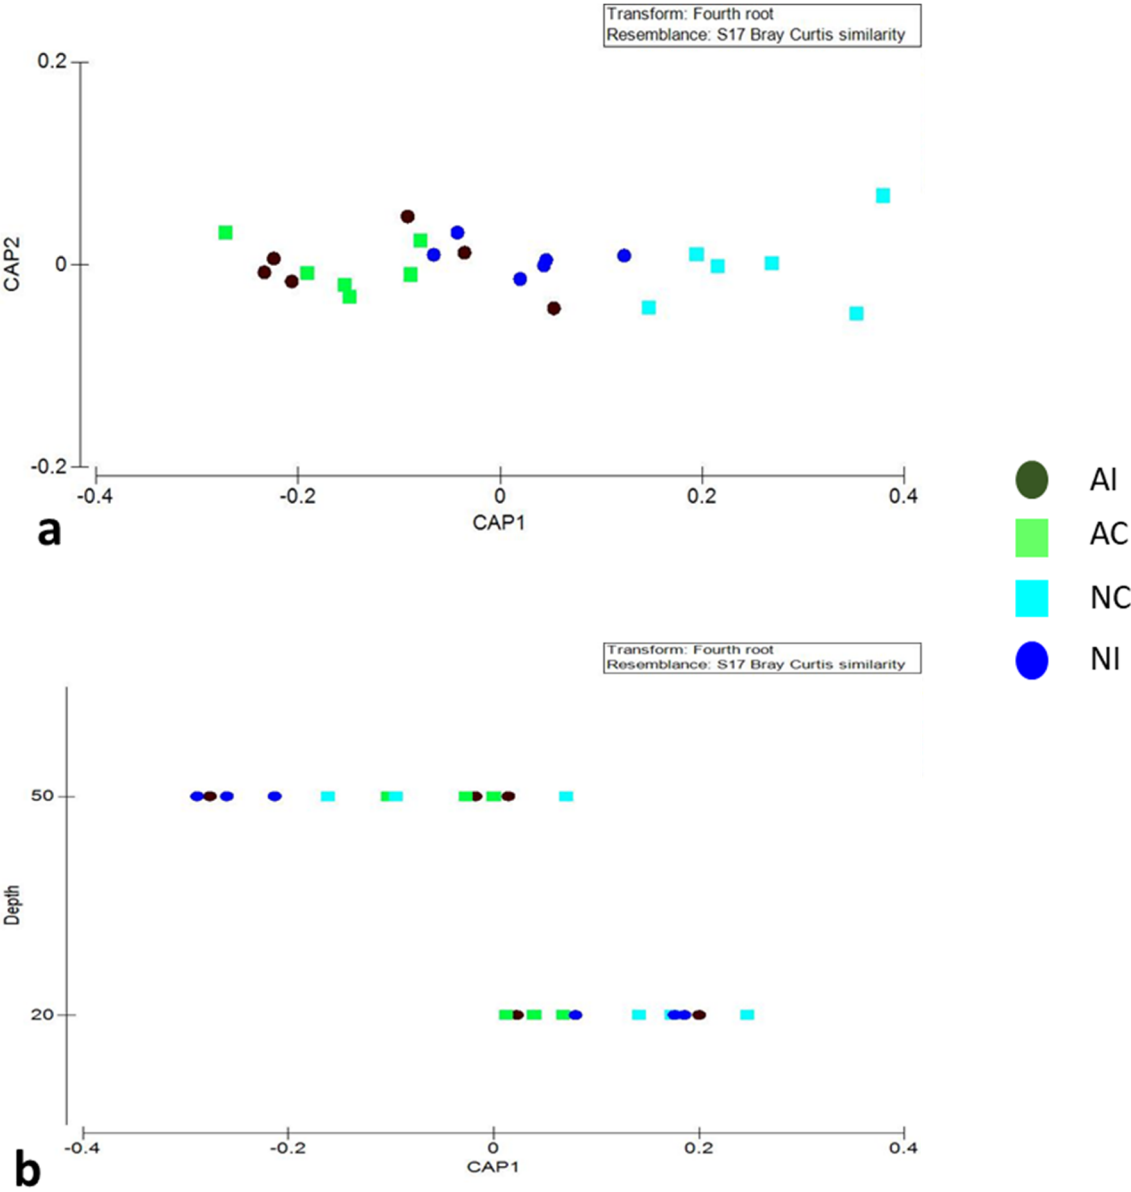

Figure S2 – Canonical Analysis of Principal coordinates (CAP) of the factor a) Area and b) Depth on dataset of rare taxa.

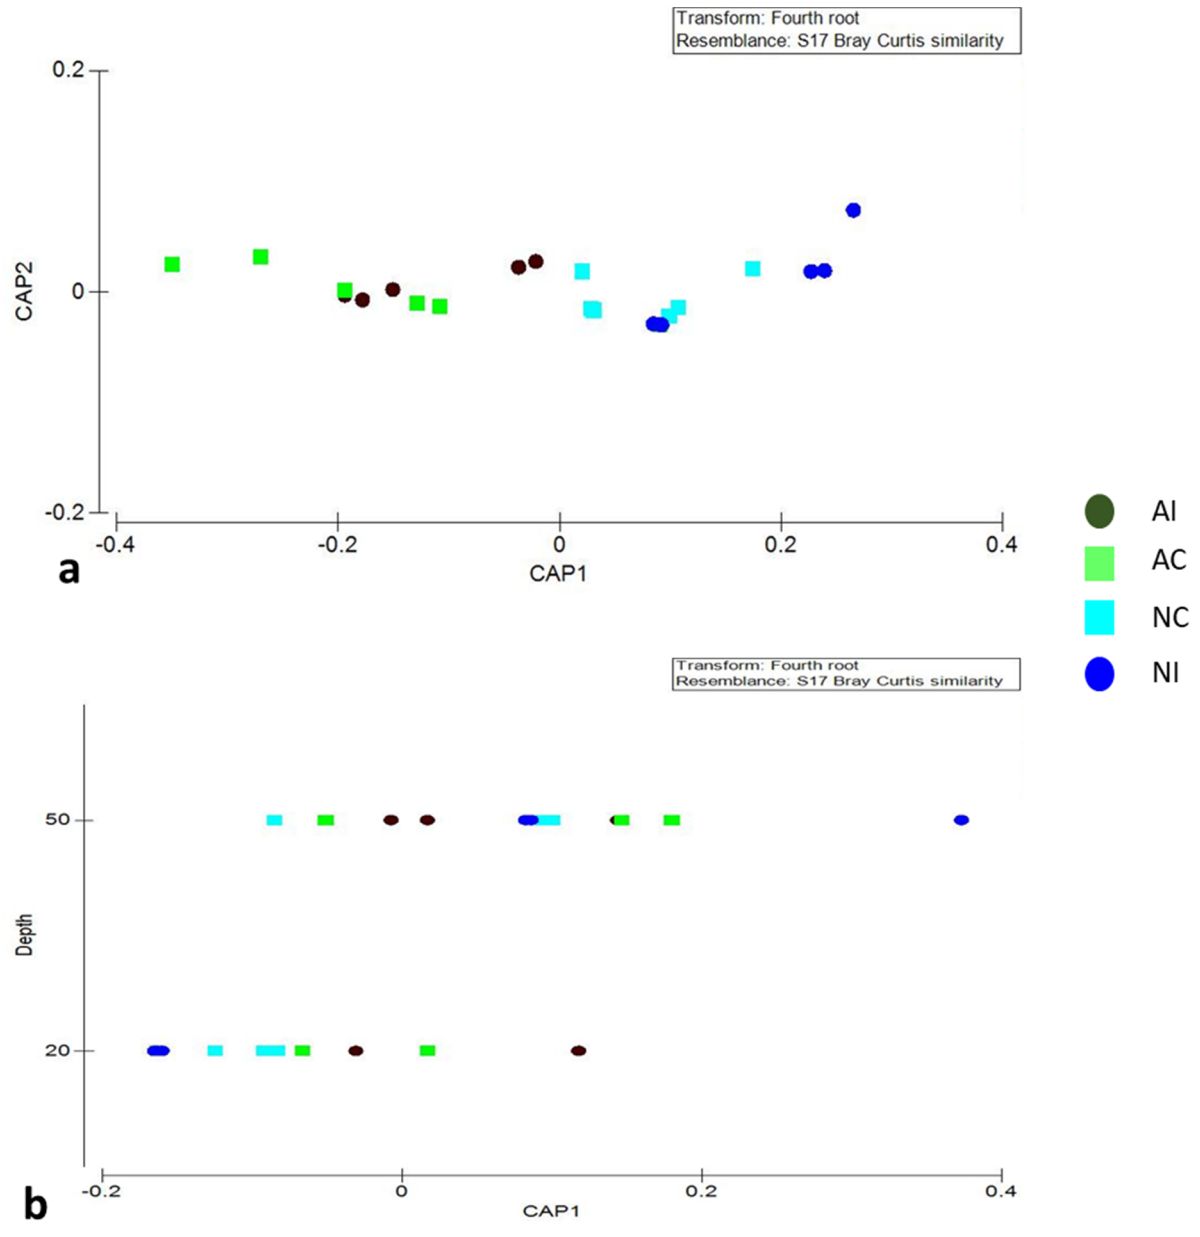

Supplement: s1 [file s1]
